# Supplementary material
Source: Springer Nature journal article supplement (https://www.springermedizin.de/resource/supplementary/12958_2007_403_MOESM4_ESM.pdf/9567814)

**A****Glands**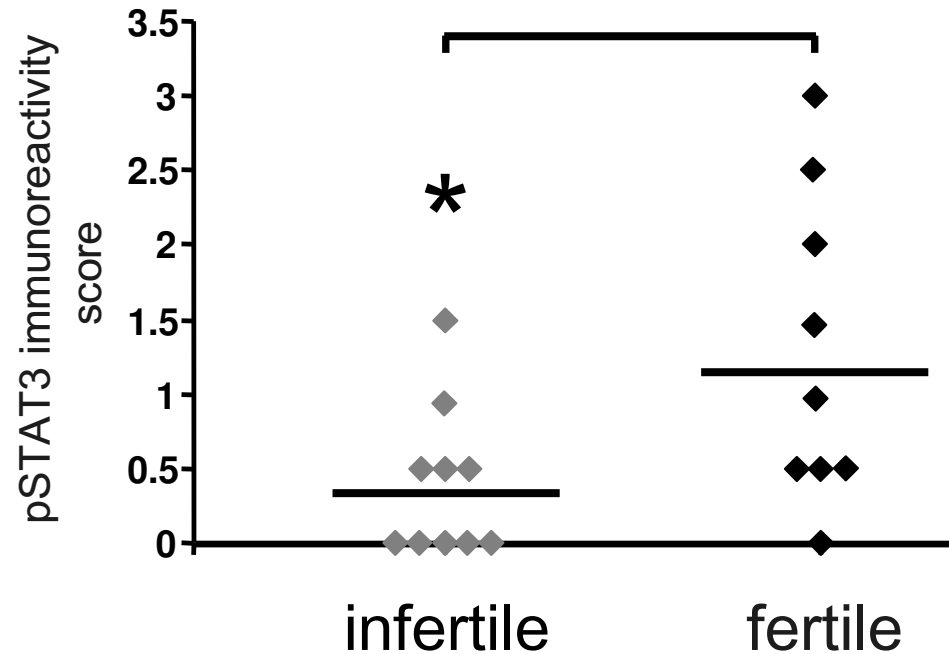**B****Stroma**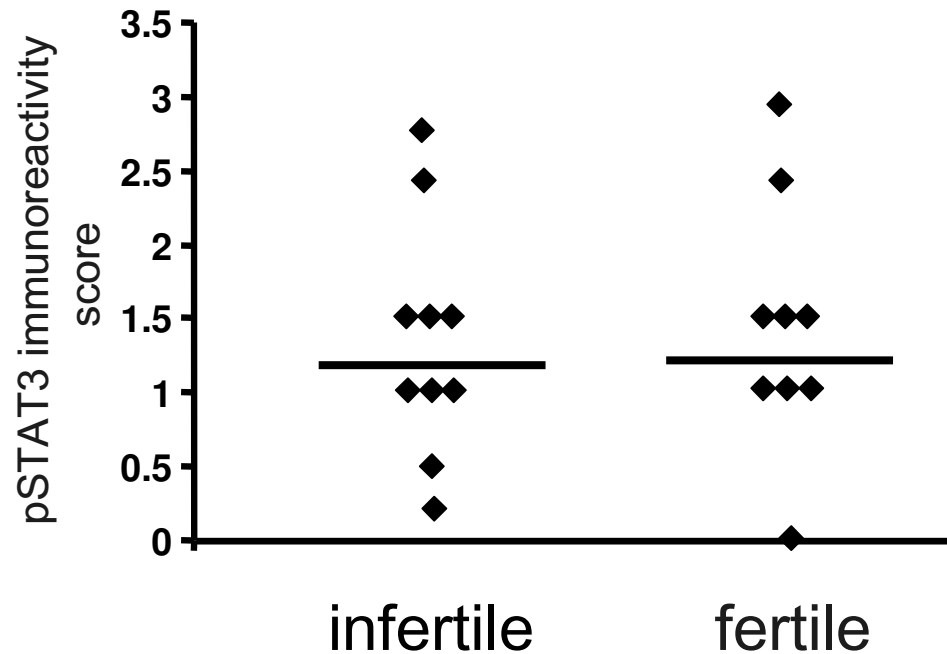

Supplement: MOESM4 [file 9567814]
